# Supplementary material for: Oleocanthal Protects C2C12 Myotubes against the Pro-Catabolic and Anti-Myogenic Action of Stimuli Able to Induce Muscle Wasting In Vivo
Source: MDPI journal article supplement (doi:10.3390/nu16091302), 2024-04-26
Supplement: s1 [file s1]

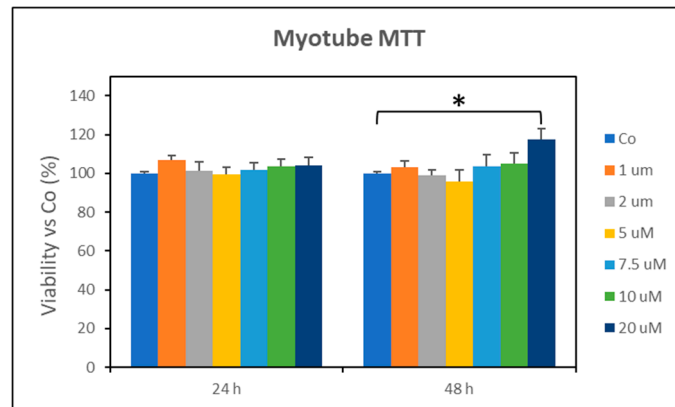

**Figure S1.** MTT assay on C2C12 myotube cultures exposed for 24 and 48 h to different OC concentrations. The results are representative of three experiments, with  $n = 8$  for each experimental condition. Data are expressed as means  $\pm$  SEM. Significance of the differences: \*— $p < 0.05$  versus Co.

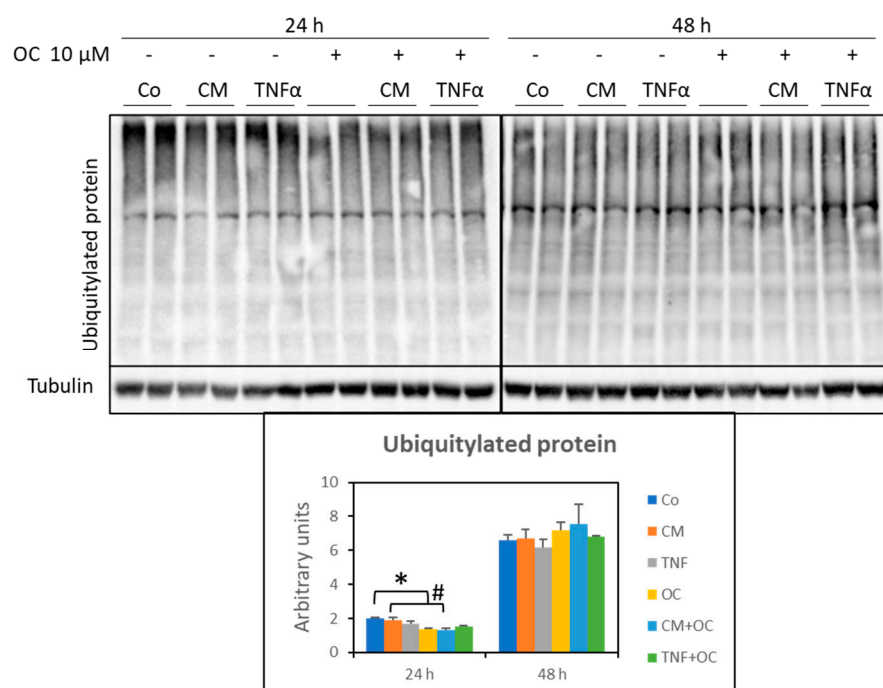

**Figure S2.** Ubiquitylated protein levels in myotube cultures exposed for 24 and 48 h to OC, CM-C26 or TNF- $\alpha$ . The results are representative of three experiments, and each experimental condition is duplicated. Data are expressed as means  $\pm$  SEM. Significance of the differences: \*— $p < 0.05$  vs. Co; #— $p < 0.05$  vs. CM-C26.

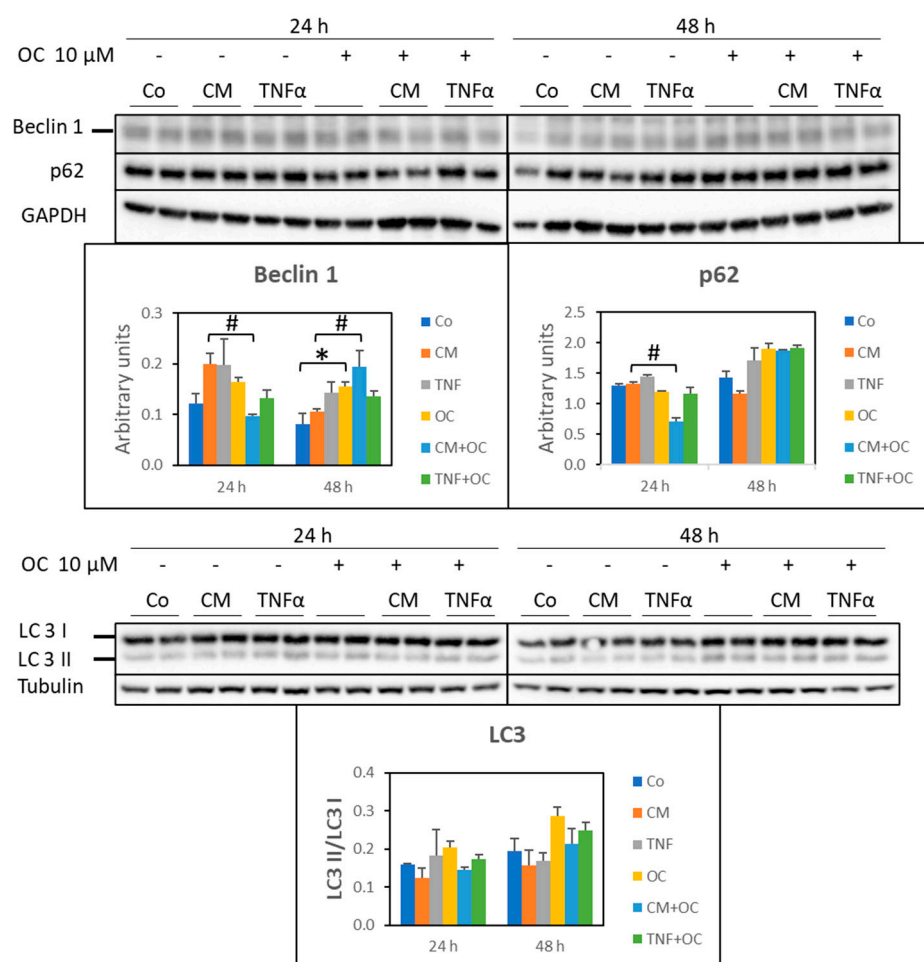

**Figure S3.** Markers of autophagy in myotube cultures exposed for 24 and 48 h to OC, CM-C26 or TNF- $\alpha$ . The results are representative of three experiments, and each experimental condition is duplicated. Data are expressed as means  $\pm$  SEM. Significance of the differences: \*— $p < 0.05$  vs. Co; #— $p < 0.05$  vs. CM-C26.
